# Supplementary material for: CoVox: A dataset of contrasting vocalizations
Source: Springer Nature journal article supplement (doi:10.3758/s13428-025-02664-9), 2025-04-11
Supplement: MOESM1 [file 13428_2025_2664_MOESM1_ESM.pdf]

## **Supplementary Materials**

### **CoVox: a dataset of contrasting vocalizations**

**Bruder, Camila\*; Larrouy-Maestri, Pauline\***

**\* Correspondence:** [cajmila@gmail.com](mailto:cajmila@gmail.com)

[plm@ae.mpg.de](mailto:plm@ae.mpg.de)

The **CoVox** dataset is freely available under a Creative Commons license.

Please find the CoVox dataset, as well as raw data from the validation experiments and analysis code at <https://osf.io/cgexn>

## Supplementary Figure S1

### *Musical Notation for the Recorded Melody Excerpts*

#### Nana Nenê (anonymous)

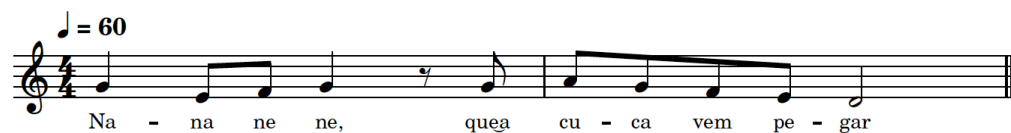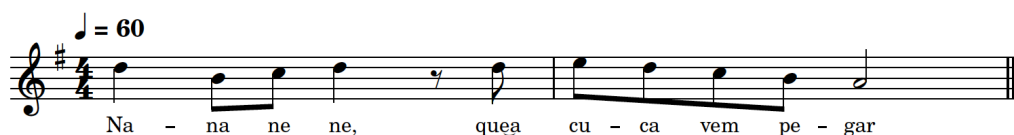

#### Boi da Cara Preta (anonymous)

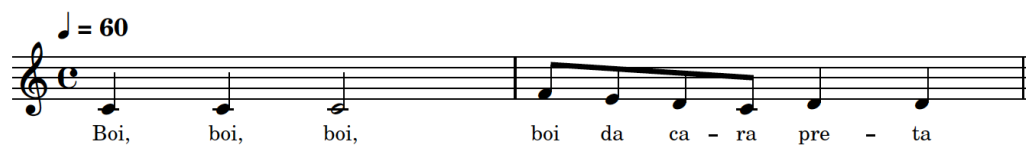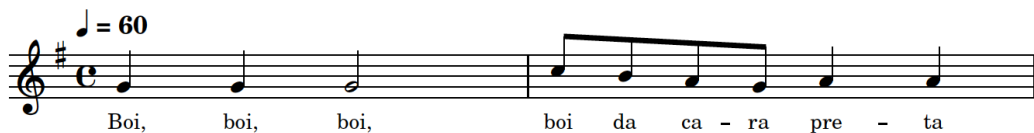

#### Alecrim Dourado (anonymous)

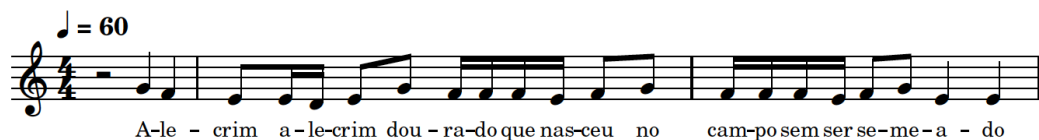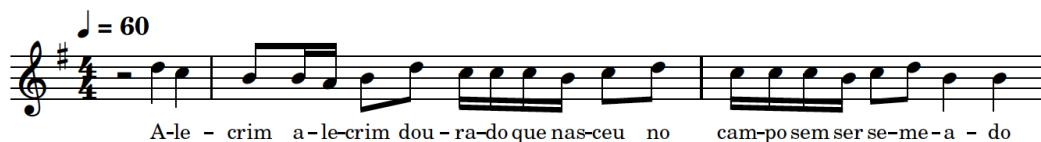

**Nesta Rua (anonymous)**

$\text{♩} = 120$

Se-es-ta ru - a, se-es - ta ru - a fos - se mi - nha

$\text{♩} = 120$

Se-es-ta ru - a, se-es - ta ru - a fos - se mi - nha

**Chove Chuva (Jorge Ben Jor)**

$\text{♩} = 60$

Cho - ve chu - va - cho - ve sem pa - rar

$\text{♩} = 60$

Cho - ve chu - va, cho - ve sem pa - rar

**Melodia Sentimental (Heitor Villa-Lobos)**

$\text{♩} = 60$

A - cor - da, vem ver a lu - a

$\text{♩} = 60$

A - cor - da, vem ver a lu - a

*Note.* The first version of each melody was used for pop and lullaby versions and the second, transposed a fourth or fifth higher, for the operatic version.

## Supporting Text S1

### *Syllable Segmentation (Determined by Sheet Music) and Translation of the Texts of Melody Material*

Nana nenê, que a cuca vem pegar

Na | na | ne | nê | que-a | cu | ca | vem | pe | gar (10 sung syllables)

*Sleep, baby, (or) the Cuca will come get*

Boi, boi, boi, boi da cara preta

Boi | boi | boi | boi | da | ca | ra | pre | ta (9 sung syllables)

*Ox, ox, ox, black-faced ox*

Alecrim, alecrim dourado que nasceu no campo sem ser semeado

A | le | crim | a | le | crim | dou | ra | do | que | na | sceu | no | cam | po | sem | ser | se | me | a | do  
(21 sung syllables)

*Rosemary, golden rosemary that was born in the field without being sown*

Se esta rua, se esta rua fosse minha

Se-es | ta | ru | a | se-es | ta | ru | a | fo | sse | mi | nha (12 sung syllables)

*If this street, if this street were mine*

Chove chuva, chove sem parar

Cho | ve | chu | va | cho | ve | sem | pa | rar (9 sung syllables)

*It's raining rain, raining non-stop*

Acorda, vem ver a lua

A | co | rda | vem | ver | a | lu | a (8 sung syllables)

*Wake up, come see the moon*

## Supplementary Figure S2

### *Proportion of Correct Recognition by Participant*

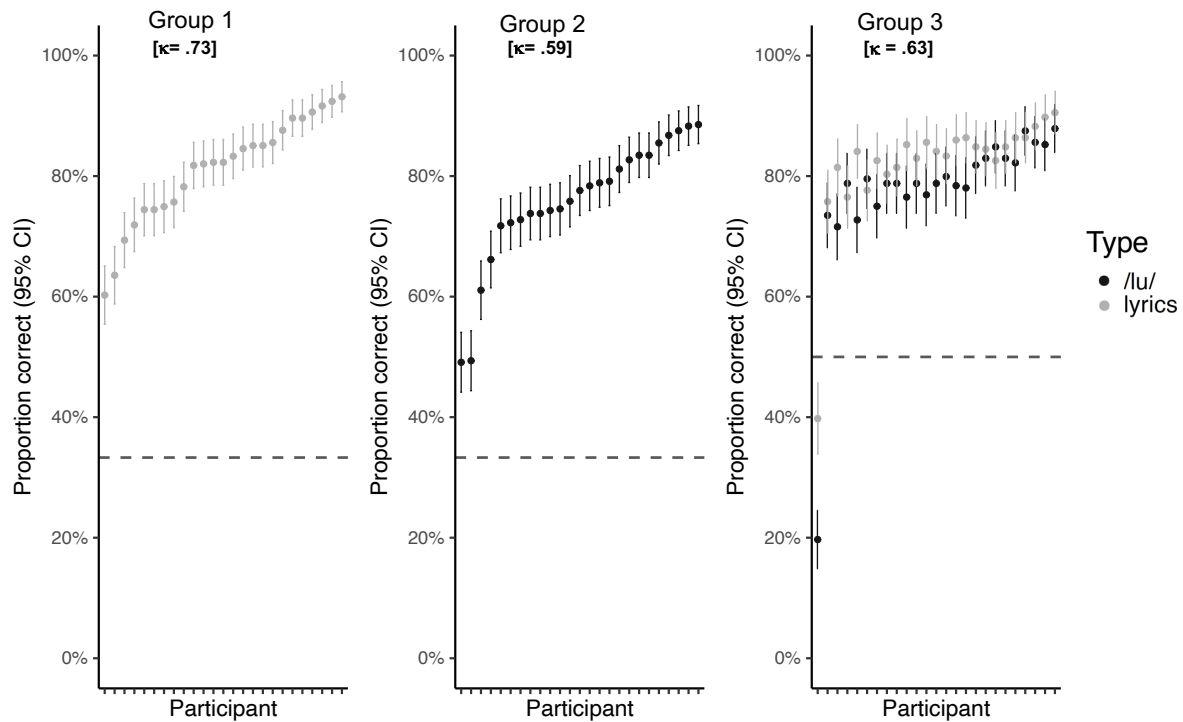

*Note.*  $N = 25$  participants in each group. Shown are raw percentages of correct recognition for each group of participants. Error bars depict 95% confidence intervals. The dashed gray horizontal line represents chance-level performance. The values between brackets represent intrarater test-retest agreement (at the group level) as measured by Cohens' kappa.

### Supplementary Table S1

*Proportion of Correct Recognition and Unbiased Hit Rate in the Validation Experiment by Vocalization Style (as %)*

| Style                  | PC   | SD   | Chance | Hu   | Hu chance |
|------------------------|------|------|--------|------|-----------|
| Adult-directed speech  | 82.2 | 38.2 | 50.0   | 64.5 | 26.4      |
| Infant-directed speech | 76.8 | 42.2 | 50.0   | 62.8 | 23.6      |
| Lullaby                | 80.0 | 40.0 | 33.3   | 60.2 | 12.0      |
| Pop                    | 69.1 | 46.2 | 33.3   | 49.1 | 10.8      |
| Opera                  | 86.4 | 34.3 | 33.3   | 77.7 | 10.6      |

*Note.* All values shown as percentages. PC: (raw) proportion of correct recognition; SD: standard deviation of PC; Chance: chance-level performance without any correction for bias; Hu: unbiased hit rate according to Wagner (1993). Hu chance: (corrected) unbiased chance-level performance according to Wagner (1993).

## Supplementary Table S2

*Proportion of Correct Recognition in the Validation Experiment by Melody, Type of Production, and Singer*

| <b>Melody</b>       | <b>% Correct</b> | <b><i>SD</i></b> |
|---------------------|------------------|------------------|
| Boi da cara preta   | 77.0             | 42.1             |
| Nesta rua           | 77.1             | 42.0             |
| Melodia sentimental | 78.2             | 41.3             |
| Chove chuva         | 80.3             | 39.8             |
| Nana nenê           | 80.3             | 39.8             |
| Alecrim dourado     | 80.5             | 39.6             |

| <b>Type of production</b> | <b>% Correct</b> | <b><i>SD</i></b> |
|---------------------------|------------------|------------------|
| /lu/                      | 76.5             | 42.4             |
| Lyrics                    | 81.4             | 38.9             |

| <b>Singer</b> | <b>% Correct</b> | <b><i>SD</i></b> |
|---------------|------------------|------------------|
| S02           | 63.6             | 48.1             |
| S14           | 65.2             | 47.7             |
| S07           | 69.8             | 45.9             |
| S19           | 72.2             | 44.8             |
| S18           | 74.2             | 43.8             |
| S08           | 76.1             | 42.7             |
| S20           | 76.7             | 42.3             |
| S03           | 78.2             | 41.3             |
| S04           | 78.2             | 41.3             |
| S09           | 78.3             | 41.2             |
| S16           | 80.0             | 40.0             |
| S12           | 81.0             | 39.2             |
| S06           | 82.1             | 38.4             |
| S11           | 82.2             | 38.3             |

|     |      |      |
|-----|------|------|
| S10 | 82.3 | 38.2 |
| S17 | 82.3 | 38.2 |
| S21 | 82.9 | 37.7 |
| S22 | 83.3 | 37.3 |
| S05 | 83.4 | 37.2 |
| S15 | 87.6 | 32.9 |
| S13 | 88.6 | 31.7 |
| S01 | 88.7 | 31.6 |

*Note.* Shown are raw percentages of correct recognition.



### Supplementary Figure S3

#### *Proportion of Correct Recognition by Singer and by Style*

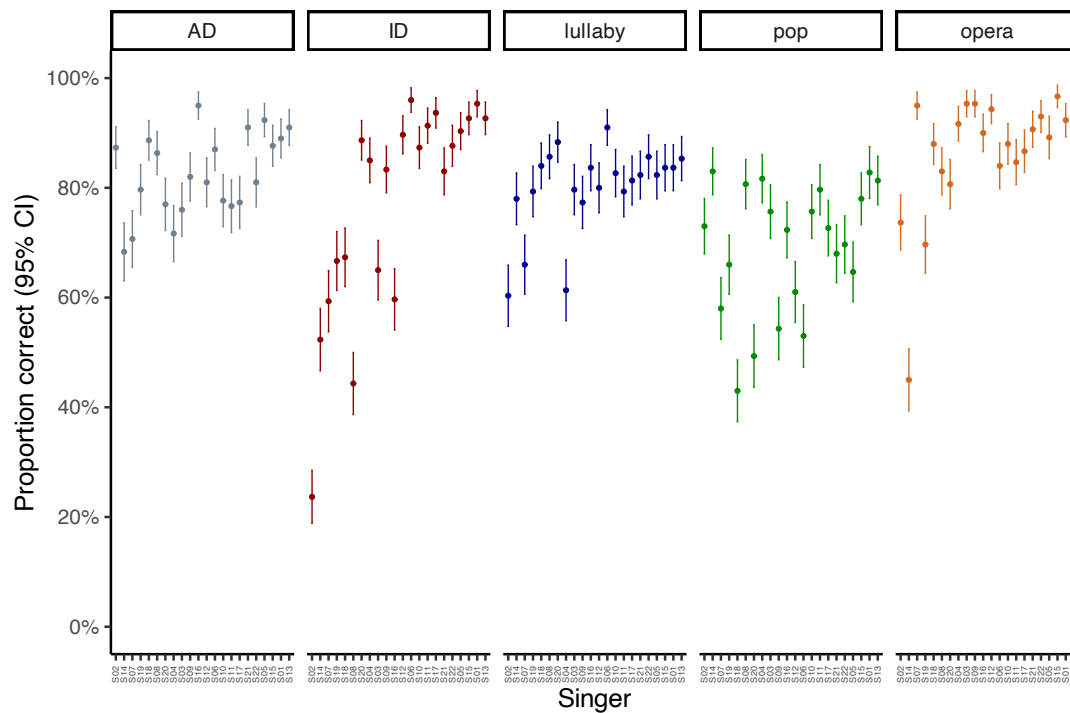

*Note.*  $N = 12$  performances in each style for each singer (6 melodies x 2 types of production). Shown are raw percentages of correct recognition. Error bars depict 95% confidence intervals. In all facets, singers are presented in the same order, based on the overall proportion of correct recognition across the five styles. AD: adult-directed speech; ID: infant-directed speech.

## Supplementary Figure S4

### *Proportion of Correct Recognition by Stimulus Item*

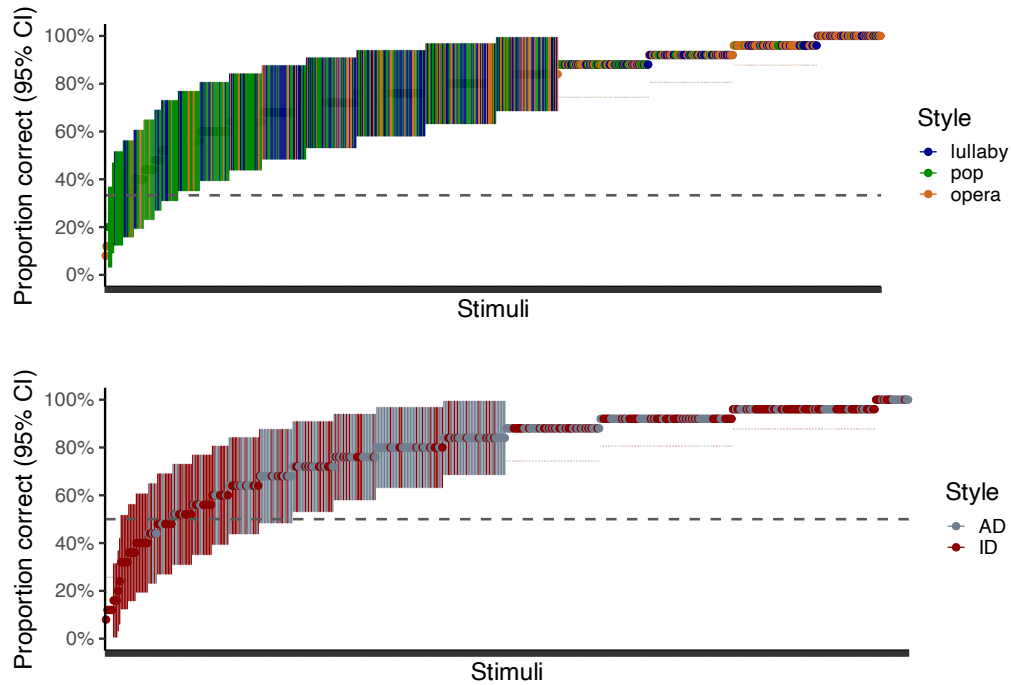

*Note.*  $N = 788$  singing stimuli (top) and 528 speech stimuli (bottom). Error bars depict 95% confidence intervals. Shown are raw percentages of correct recognition. The dashed gray horizontal line represents chance-level performance. AD: adult-directed speech; ID: infant-directed speech.

**Supplementary Table S3***Mixed Effects Logistic Regression of Accuracy of Style Recognition*

| <i>Predictors</i>    | <i>Log-Odds</i> | <i>CI</i>     | <i>Statistic</i> | <i>p</i>         |
|----------------------|-----------------|---------------|------------------|------------------|
| Style c [AD]         | 1.68            | 1.31 – 2.04   | 8.98             | <b>&lt;0.001</b> |
| Style c [ID]         | 1.41            | 1.05 – 1.78   | 7.57             | <b>&lt;0.001</b> |
| Style c [lullaby]    | 1.62            | 1.25 – 1.98   | 8.67             | <b>&lt;0.001</b> |
| Style c [pop]        | 0.75            | 0.39 – 1.11   | 4.07             | <b>&lt;0.001</b> |
| Style c [opera]      | 2.13            | 1.76 – 2.50   | 11.26            | <b>&lt;0.001</b> |
| Type [lyrics]        | 0.45            | 0.20 – 0.69   | 3.56             | <b>&lt;0.001</b> |
| Melody c1            | 0.04            | -0.13 – 0.21  | 0.48             | 0.629            |
| Melody c2            | 0.07            | -0.10 – 0.24  | 0.79             | 0.432            |
| Melody c3            | 0.21            | 0.04 – 0.39   | 2.41             | <b>0.016</b>     |
| Melody c4            | -0.03           | -0.21 – 0.14  | -0.40            | 0.690            |
| Melody c5            | -0.18           | -0.35 – -0.01 | -2.03            | <b>0.042</b>     |
| Style c1 × Melody c1 | 0.29            | 0.04 – 0.55   | 2.29             | <b>0.022</b>     |
| Style c2 × Melody c1 | -0.11           | -0.36 – 0.13  | -0.90            | 0.370            |
| Style c3 × Melody c1 | -0.92           | -1.15 – -0.68 | -7.56            | <b>&lt;0.001</b> |
| Style c4 × Melody c1 | 0.85            | 0.61 – 1.10   | 6.84             | <b>&lt;0.001</b> |
| Style c1 × Melody c2 | 0.16            | -0.09 – 0.40  | 1.22             | 0.222            |
| Style c2 × Melody c2 | -0.02           | -0.27 – 0.23  | -0.15            | 0.879            |
| Style c3 × Melody c2 | -0.01           | -0.26 – 0.23  | -0.10            | 0.924            |
| Style c4 × Melody c2 | 0.32            | 0.09 – 0.56   | 2.67             | <b>0.008</b>     |
| Style c1 × Melody c3 | -0.43           | -0.67 – -0.18 | -3.40            | <b>0.001</b>     |
| Style c2 × Melody c3 | 0.26            | 0.00 – 0.51   | 1.98             | <b>0.048</b>     |
| Style c3 × Melody c3 | 1.09            | 0.81 – 1.37   | 7.74             | <b>&lt;0.001</b> |
| Style c4 × Melody c3 | -0.93           | -1.17 – -0.69 | -7.74            | <b>&lt;0.001</b> |
| Style c1 × Melody c4 | 0.06            | -0.18 – 0.31  | 0.50             | 0.620            |

|                                                      |               |               |       |                  |
|------------------------------------------------------|---------------|---------------|-------|------------------|
| Style c2 × Melody c4                                 | -0.08         | -0.32 – 0.17  | -0.61 | 0.542            |
| Style c3 × Melody c4                                 | -0.47         | -0.71 – -0.24 | -3.89 | <b>&lt;0.001</b> |
| Style c4 × Melody c4                                 | -0.08         | -0.32 – 0.16  | -0.67 | 0.502            |
| Style c1 × Melody c5                                 | -0.21         | -0.45 – 0.03  | -1.70 | 0.090            |
| Style c2 × Melody c5                                 | 0.24          | -0.01 – 0.49  | 1.92  | 0.055            |
| Style c3 × Melody c5                                 | 0.66          | 0.41 – 0.91   | 5.11  | <b>&lt;0.001</b> |
| Style c4 × Melody c5                                 | -0.02         | -0.26 – 0.21  | -0.19 | 0.848            |
| Style c1 × Type [lyrics]                             | -0.05         | -0.36 – 0.26  | -0.33 | 0.744            |
| Style c2 × Type [lyrics]                             | -0.03         | -0.34 – 0.28  | -0.17 | 0.862            |
| Style c3 × Type [lyrics]                             | -0.07         | -0.34 – 0.19  | -0.55 | 0.579            |
| Style c4 × Type [lyrics]                             | 0.10          | -0.16 – 0.36  | 0.77  | 0.441            |
| Type [lyrics] × Melody c1                            | 0.05          | -0.20 – 0.29  | 0.37  | 0.713            |
| Type [lyrics] × Melody c2                            | -0.04         | -0.29 – 0.21  | -0.32 | 0.748            |
| Type [lyrics] × Melody c3                            | 0.00          | -0.25 – 0.25  | 0.02  | 0.988            |
| Type [lyrics] × Melody c4                            | -0.01         | -0.25 – 0.24  | -0.05 | 0.962            |
| Type [lyrics] × Melody c5                            | -0.00         | -0.24 – 0.24  | -0.01 | 0.992            |
| ICC Stimulus                                         | 0.15          |               |       |                  |
| ICC Participant                                      | 0.09          |               |       |                  |
| ICC Singer                                           | 0.05          |               |       |                  |
| N Participant                                        | 75            |               |       |                  |
| N Stimulus                                           | 1316          |               |       |                  |
| N Singer                                             | 22            |               |       |                  |
| Observations                                         | 32900         |               |       |                  |
| Marginal R <sup>2</sup> / Conditional R <sup>2</sup> | 0.093 / 0.355 |               |       |                  |

*Note.* Model syntax: lme4::glmer (Accuracy ~ 0 + Style + Type + Melody + Style:Melody + Style:Type + Type:Melody + (1 | Participant) + (1 | Stimulus) + (1 | Singer), family = binomial(link = “logit”))

## Supplementary Figure S5

### *Accuracy of Style Recognition – All Main Effects and Interactions*

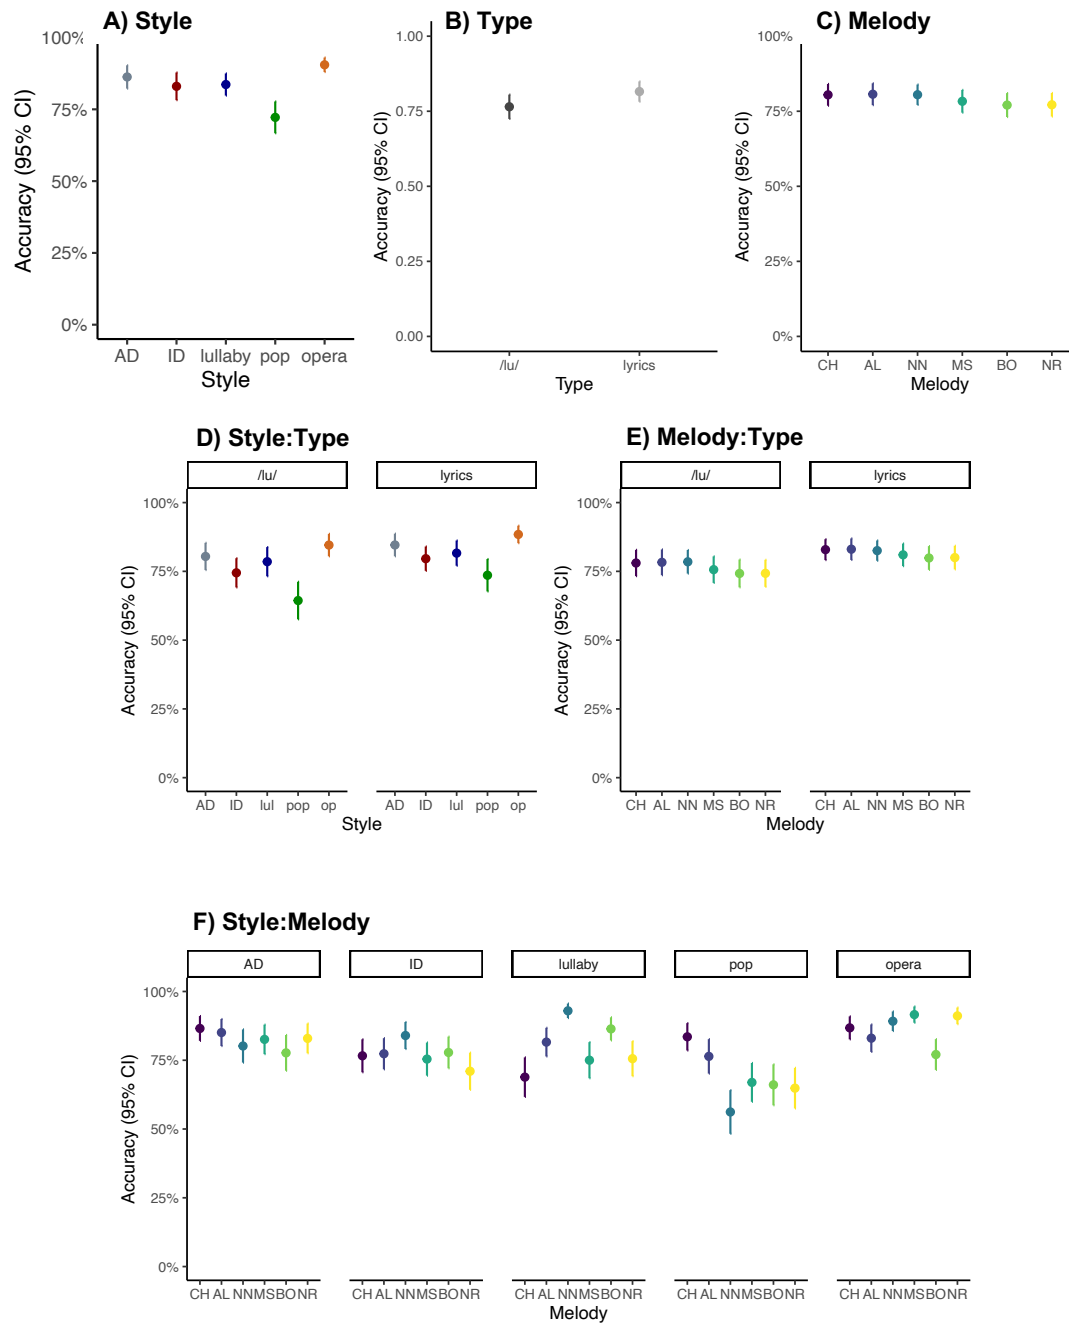

*Note.* Model-based predictions from the mixed logistic regression model described in Supplementary Table S2 (using the `avg_predictions` function from the `marginalEffects` R package). Error bars depict 95% confidence intervals. AD: adult-directed speech; ID: infant-directed speech; CH: Chove Chuva, AL: Alecrim Dourado; NN: Nana Nenê; MS: Melodia Sentimental; BO: Boi da Cara Preta; NR: Nesta Rua.

## Supporting Text S2

### *Control experiment*

Considering that we set different loudness levels for each singing style, we wondered how much the high style recognition found in the main experiment was related to the different levels of loudness. To investigate this, we conducted a control experiment in which all singing stimuli were normalized to the same loudness level.

**Participants.** Ten additional participants (6 self-reported as female, 3 as male, 1 undisclosed;  $M = 49.8$  years old,  $SD = 19.2$ ; 9 with German as mother tongue, 3 of which bilinguals, none of which with Portuguese as mother tongue) were recruited from the participant database of the Max Planck Institute for Empirical Aesthetics, in Frankfurt, Germany. They did not report having any hearing impairment and were lay listeners, with an average music sophistication score of 88.5 ( $SD = 10.6$ ) according to the same 18-items adapted version of the scale of music sophistication of Gold-MSI (Müllensiefen et al., 2014). As before, participants provided written informed consent and were compensated at the rate of 14€ per hour of participation. The experimental procedure was ethically approved by the Ethics Council of the Max Planck Society, and participants were tested in the laboratories of the Max Planck Institute for Empirical Aesthetics, in Frankfurt, Germany.

**Material.** We used half of the singing performances of the main experiment, that is, a subset of 396 performances corresponding to the three melodies Nana Nenê, Chove Chuva, and Melodia Sentimental. Using the software To Audio Converter (version 1.0.16 – 1059), all stimuli were loudness normalized (following the EBU-R128 standard) to -23 LUFS.

**Procedure.** In relation to the main experiment, the only difference in procedure was that participants were presented both with performances with lyrics and with /lu/ - in different blocks of trials, and in counterbalanced order. As before, stimuli from different styles were presented intermixed and in random order. The task was the same forced-choice recognition task prosed to participants of Groups 1 and 2 of the main experiment, where participants had to indicate if singing performances sounded like a lullaby, a pop song, or an opera aria. We also included 20

repeated trials at the end of respective blocks (10 trials for stimuli with lyrics and 10 for stimuli with /lu/) so we could compute the test-retest intrarater agreement as before.

**Statistical analyses.** We repeated the analyses described for the main experiment: for each style and across all participants, we compared the proportion of accurate responses to chance-level performance (33% correct recognition) with Z-tests for proportions (one-tailed; aggregating performances with lyrics and with /lu/; and adjusting p-values to control the FWER with the Holm method). We compared results between experiments based both on the overall proportion of correct responses (CR) between both experiments (two-tailed Z-tests for proportions) and with pairwise comparisons between corresponding styles (two-tailed Z-tests for proportions, adjusting p-values to control the FWER of 3 comparisons with the Holm method). We calculated unbiased hit rates (Wagner, 1993), and conducted analysis of test-retest intrarater agreement based on repeated stimuli. We also fit the same mixed effects logistic model proposed for the main experiment, predicting accuracy at the individual trial level from the Style, the Type of performance and the Melody, and including random intercepts for participants, stimuli items and singers.

**Results.** The overall proportion of CR was 72.2%, which is lower than the 79% CR reported in the main experiment ( $\chi^2(1) = 94.8, p < .001$ ). The proportion of CR was 81.6% for operatic, 70.7% for lullaby, and 64.5% for pop singing. These proportions are all above chance-level performance (adj.  $ps < .001$ ). Unbiased hit rates were between 17.2% and 37.7% lower than proportions of CR: 67.5% for operatic, 51% for lullaby, and 40% for pop singing (unbiased chance level performance: 11% , 10.9%, and 11.5%, respectively).

Supplementary Figure S6 shows participants' style classification in the control experiment in relation to the presented stimuli. The majority of mistakes corresponded to participants answering that pop performances were lullabies, and vice-versa. Importantly, the proportion of CR by stimulus item was highly correlated between experiments ( $r_{(394)} = .79, p < .001$ ), indicating that items that were well recognized in the main experiment also tended to be well recognized in the control experiment.

## Supplementary Figure S6

### *Classification of Styles in the Control Experiment*

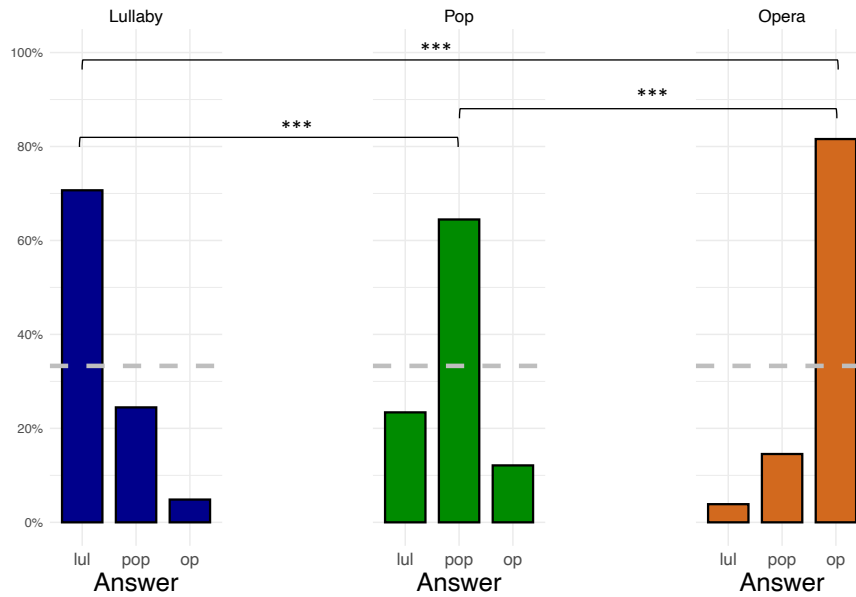

*Note.* In each plot, the y axis depicts the proportion of given responses in trials with different styles of vocalization. The dashed gray horizontal line represents chance-level performance (33%). lul: lullaby; op: opera.

We also fit the same mixed logistic model described for the main experiment to the data collected for this control experiment. The model revealed a significant effect of Style and interactions between Style and Melody and Style and Type. Please see Supplementary Table S4 for the model estimates and Supplementary Figure S7 for model-based predictions of all main effects and interactions.



**Supplementary Table S4***Mixed Effects Logistic Regression of Accuracy of Style Recognition in the Control Experiment*

| <i>Predictors</i>                                    | <i>Log-Odds</i> | <i>CI</i>     | <i>Statistic</i> | <i>p</i>         |
|------------------------------------------------------|-----------------|---------------|------------------|------------------|
| Style c [lullaby]                                    | 1.35            | 0.80 – 1.90   | 4.78             | <b>&lt;0.001</b> |
| Style c [opera]                                      | 1.75            | 1.20 – 2.31   | 6.17             | <b>&lt;0.001</b> |
| Style c [pop]                                        | 0.58            | 0.04 – 1.12   | 2.09             | <b>0.037</b>     |
| Type [lyrics]                                        | 0.04            | -0.14 – 0.22  | 0.47             | 0.640            |
| Melody c1                                            | -0.03           | -0.21 – 0.15  | -0.36            | 0.716            |
| Melody c2                                            | -0.11           | -0.29 – 0.07  | -1.23            | 0.219            |
| Style c1 × Melody c1                                 | -0.62           | -0.80 – -0.44 | -6.74            | <b>&lt;0.001</b> |
| Style c2 × Melody c1                                 | -0.23           | -0.41 – -0.05 | -2.44            | <b>0.015</b>     |
| Style c1 × Melody c2                                 | -0.71           | -0.89 – -0.53 | -7.67            | <b>&lt;0.001</b> |
| Style c2 × Melody c2                                 | 0.45            | 0.26 – 0.64   | 4.57             | <b>&lt;0.001</b> |
| Style c1 × Type [lyrics]                             | -0.31           | -0.57 – -0.06 | -2.38            | <b>0.017</b>     |
| Style c2 × Type [lyrics]                             | -0.01           | -0.27 – 0.26  | -0.04            | 0.968            |
| Type [lyrics] × Melody c1                            | -0.01           | -0.26 – 0.25  | -0.06            | 0.953            |
| Type [lyrics] × Melody c2                            | 0.10            | -0.16 – 0.35  | 0.75             | 0.451            |
| ICC Stimulus                                         | 0.041           |               |                  |                  |
| ICC Participant                                      | 0.142           |               |                  |                  |
| ICC Singer                                           | 0.031           |               |                  |                  |
| N Participant                                        | 10              |               |                  |                  |
| N Stimulus                                           | 396             |               |                  |                  |
| N Singer                                             | 22              |               |                  |                  |
| Observations                                         | 3960            |               |                  |                  |
| Marginal R <sup>2</sup> / Conditional R <sup>2</sup> | 0.151 / 0.333   |               |                  |                  |

*Note.* Model syntax: lme4::glmer (Accuracy ~ 0 + Style + Type + Melody + Style:Melody + Style:Type + Type:Melody + (1 | Participant) + (1 | Stimulus) + (1 | Singer), data, family = binomial(link = "logit"))

## Supplementary Figure S7

### *Accuracy of Style Recognition in the Control Experiment*

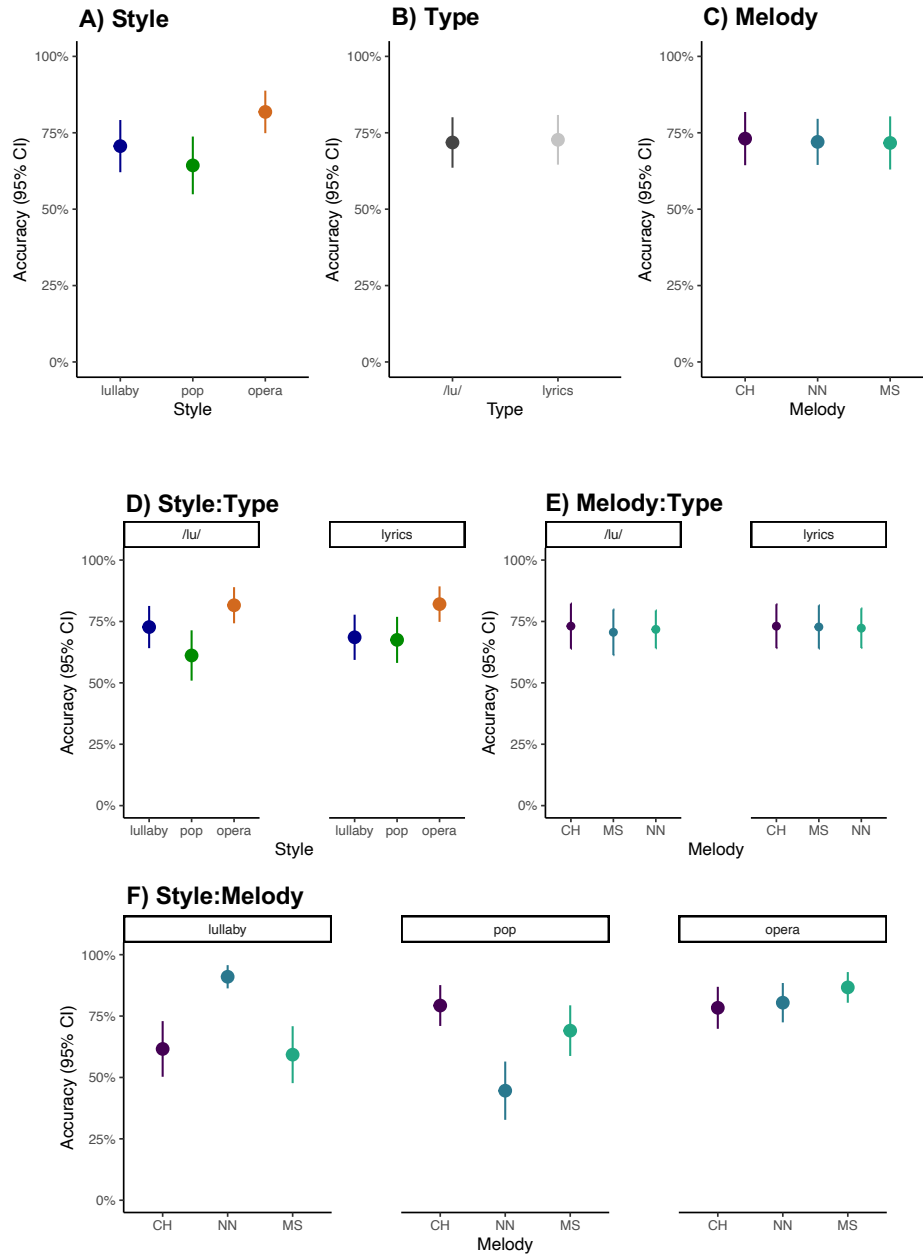

*Note.* Model-based predictions from the mixed logistic regression model described in Supplementary Table S4 (using the `avg_predictions` function from the marginal effects R package). Error bars depict 95% confidence intervals. AD: adult-directed speech; ID: infant-directed speech; CH: Chove Chuva, NN: Nana Nenê, MS: Melodia Sentimental.

Interestingly, the interaction between Style and Melody replicated the observation made in the main experiment that melodies were better recognized when performed in a style congruent to their original genre: as portrayed in Supplementary Figure S7F, the melody Nana Nenê, originally a lullaby, was better recognized when performed as a lullaby; Chove Chuva, originally a pop “MPB” song, was better recognized when performed as a pop song; and Melodia Sentimental, originally an art song, was better recognized when performed as an opera aria.

The proportion of correct recognition by each participant ranged from 43.9% to 88.4% (see Supplementary Figure 8), confirming that recognition was above chance level for all participants, and that most participants could do the task with good accuracy.

### Supplementary Figure S8

#### *Proportion of Correct Recognition by Participant in the Control Experiment*

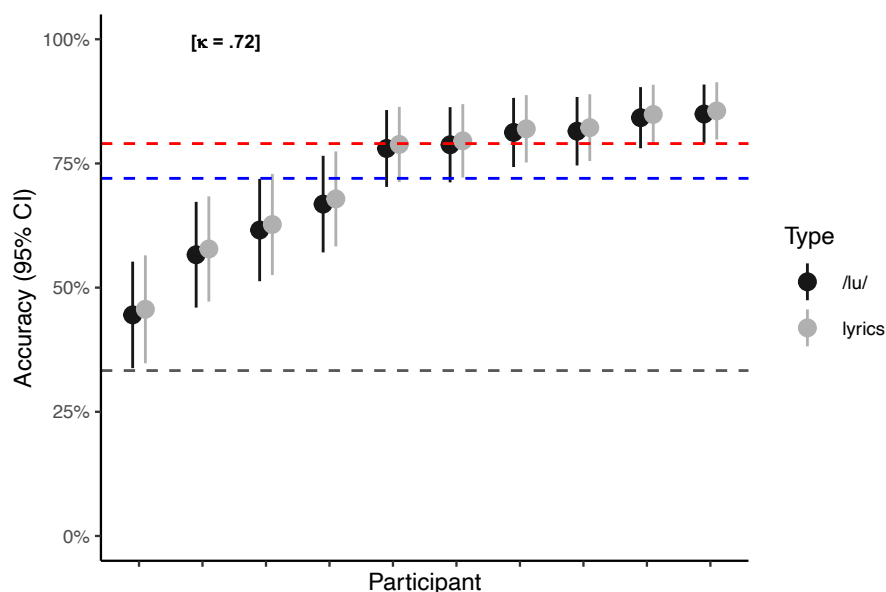

*Note.*  $N = 10$  participants. Model-based predictions from the mixed logistic regression model described in Supplementary Table S4 (using the `avg_predictions` function from the marginal effects R package). Error bars depict 95% confidence intervals. The gray dashed horizontal line (bottom line) represents chance-level performance. The red dashed horizontal line (top line) represents the average proportion of correct recognition in the main experiment, and the blue dashed horizontal line (middle line) represents the average proportion of correct recognition in

the control experiment. The value between brackets represents intrarater test-retest agreement (at the group level) as measured by Cohens' kappa.

In summary, the slightly higher rate of correct style recognition in the main experiment suggests that the different loudness levels between styles in that particular experiment aided participants' style recognition. Nevertheless, the (still) high style recognition rate in the control experiment indicates that the difference in loudness levels was not a critical factor for accurate style recognition, that is, that other perceptual features were enough to guide participants in their style recognition. We refer interested readers to Bruder and Larrouy-Maestri (2023) for a more detailed comparison of the main and the control experiments, as well as exploratory analyses on the role of acoustic features in the perceptual categorization of different singing styles.

## Supporting Text S3

### *Extraction of additional acoustic descriptors*

*Soundgen.* A total of 163 features were extracted, presented as mean, median, and standard deviation summaries per file. We used the `analyze` function for batch extraction (`soundgen::analyze(wav_list, pitchFloor = 85, pitchCeiling = 800, samplingRate = 44100, windowLength = 20)`). Please refer to Anikin (2019) for further details about Soundgen, and to the developers' website ([http://cogsci.se/soundgen/acoustic\\_analysis.html](http://cogsci.se/soundgen/acoustic_analysis.html)) for a summary of these features. Here is a list with the names of extracted features: `duration`, `duration_noSilence`, `voiced`, `voiced_noSilence`, `amEnvDep_mean`, `amEnvDep_median`, `amEnvDep_sd`, `amEnvDepVoiced_mean`, `amEnvDepVoiced_median`, `amEnvDepVoiced_sd`, `amEnvFreq_mean`, `amEnvFreq_median`, `amEnvFreq_sd`, `amEnvFreqVoiced_mean`, `amEnvFreqVoiced_median`, `amEnvFreqVoiced_sd`, `amMsFreq_mean`, `amMsFreq_median`, `amMsFreq_sd`, `amMsFreqVoiced_mean`, `amMsFreqVoiced_median`, `amMsFreqVoiced_sd`, `amMsPurity_mean`, `amMsPurity_median`, `amMsPurity_sd`, `amMsPurityVoiced_mean`, `amMsPurityVoiced_median`, `amMsPurityVoiced_sd`, `ampl_mean`, `ampl_median`, `ampl_sd`, `ampl_noSilence_mean`, `ampl_noSilence_median`, `ampl_noSilence_sd`, `amplVoiced_mean`, `amplVoiced_median`, `amplVoiced_sd`, `CPP_mean`, `CPP_median`, `CPP_sd`, `dom_mean`, `dom_median`, `dom_sd`, `domVoiced_mean`, `domVoiced_median`, `domVoiced_sd`, `entropy_mean`, `entropy_median`, `entropy_sd`, `entropySh_mean`, `entropySh_median`, `entropySh_sd`, `entropyShVoiced_mean`, `entropyShVoiced_median`, `entropyShVoiced_sd`, `entropyVoiced_mean`, `entropyVoiced_median`, `entropyVoiced_sd`, `f1_freq_mean`, `f1_freq_median`, `f1_freq_sd`, `f1_width_mean`, `f1_width_median`, `f1_width_sd`, `f2_freq_mean`, `f2_freq_median`, `f2_freq_sd`, `f2_width_mean`, `f2_width_median`, `f2_width_sd`, `f3_freq_mean`, `f3_freq_median`, `f3_freq_sd`, `f3_width_mean`, `f3_width_median`, `f3_width_sd`, `flux_mean`, `flux_median`, `flux_sd`, `fmDep_mean`, `fmDep_median`, `fmDep_sd`, `fmFreq_mean`, `fmFreq_median`, `fmFreq_sd`, `fmPurity_mean`, `fmPurity_median`, `fmPurity_sd`, `harmEnergy_mean`, `harmEnergy_median`, `harmEnergy_sd`, `harmHeight_mean`, `harmHeight_median`, `harmHeight_sd`, `HNR_mean`, `HNR_median`, `HNR_sd`, `HNRVoiced_mean`, `HNRVoiced_median`, `HNRVoiced_sd`, `loudness_mean`, `loudness_median`, `loudness_sd`, `loudnessVoiced_mean`, `loudnessVoiced_median`, `loudnessVoiced_sd`, `novelty_mean`, `novelty_median`, `novelty_sd`, `noveltyVoiced_mean`, `noveltyVoiced_median`,

noveltyVoiced\_sd, peakFreq\_mean, peakFreq\_median, peakFreq\_sd, peakFreqVoiced\_mean, peakFreqVoiced\_median, peakFreqVoiced\_sd, pitch\_mean, pitch\_median, pitch\_sd, quartile25\_mean, quartile25\_median, quartile25\_sd, quartile25Voiced\_mean, quartile25Voiced\_median, quartile25Voiced\_sd, quartile50\_mean, quartile50\_median, quartile50\_sd, quartile50Voiced\_mean, quartile50Voiced\_median, quartile50Voiced\_sd, quartile75\_mean, quartile75\_median, quartile75\_sd, quartile75Voiced\_mean, quartile75Voiced\_median, quartile75Voiced\_sd, roughness\_mean, roughness\_median, roughness\_sd, roughnessVoiced\_mean, roughnessVoiced\_median, roughnessVoiced\_sd, specCentroid\_mean, specCentroid\_median, specCentroid\_sd, specCentroidVoiced\_mean, specCentroidVoiced\_median, specCentroidVoiced\_sd, specSlope\_mean, specSlope\_median, specSlope\_sd, specSlopeVoiced\_mean, specSlopeVoiced\_median, specSlopeVoiced\_sd, subDep\_mean, subDep\_median, subDep\_sd, subRatio\_mean, subRatio\_median, subRatio\_sd

*Essentia*. While exploring possibly useful features to characterize our stimuli, we also extracted multiple features using the Essentia toolbox (Bogdanov et al., 2013), an open-source C++ library for music information retrieval (MIR). While we do not use them in our characterization of the vocalizations, we also make them available with the hope that they may be useful to other researchers (e.g., when comparing toolboxes for audio signal description). We used the out-of-box executable streaming extractor freesound ([https://essentia.upf.edu/freesound\\_extractor.html](https://essentia.upf.edu/freesound_extractor.html)) to extract the following low-level features: average\_loudness, barkbands\_kurtosis, barkbands\_skewness, barkbands\_spread, dissonance, hfc, pitch, pitch\_instantaneous\_confidence, pitch\_salience, silence\_rate\_20dB, silence\_rate\_30dB, silence\_rate\_60dB, spectral\_complexity, spectral\_crest, spectral\_decrease, spectral\_energy, spectral\_energyband\_high, spectral\_energyband\_low, spectral\_energyband\_middle\_high, spectral\_energyband\_middle\_low, spectral\_entropy, spectral\_flatness\_db, spectral\_flux, spectral\_rms, spectral\_rolloff, spectral\_skewness, spectral\_spread, spectral\_centroid, spectral\_kurtosis, spectral\_strongpeak, zerocrossingrate, barkbands (01-27), frequency\_bands (01-27), gfcc (01-13), mfcc (01-13), scvalleys (01-06), spectral\_contrast (01-06). Note that barkbands and frequency\_bands refer to 27 spectral subbands, gfcc and mfcc refer to 13 spectral subbands, and scvalleys and spectral\_contrast to six subbands. For each feature, an average value and standard deviation were extracted, and in some cases also the variance of the derivative of a feature (dvar). We excluded all barkbands.dmean

measures, which were perfectly correlated with `frequency_bands.dmean` measures, and report a total of 186 features. Please refer to [https://essentia.upf.edu/freesound\\_extractor.html](https://essentia.upf.edu/freesound_extractor.html) for a description of algorithms.

*VoiceSauce*. In addition to the measures reported in the main text, we also report VoiceSauce's Energy measure (Root Mean Square Energy), generally used to evaluate the amplitude of the audio signal; and various formant estimations (`pF1_mean`, `pF2_mean`, `pF3_mean`, `pF4_mean`) based on Praat's Burg algorithm (and using the same settings of `pitch_floor` = 85 and `pitch_ceiling` = 600 Hz as in other analyses). Please see Shue et al. (2011) for more information about VoiceSauce.

**Supplementary Figure S9***Screeplot of Principal Component Analysis*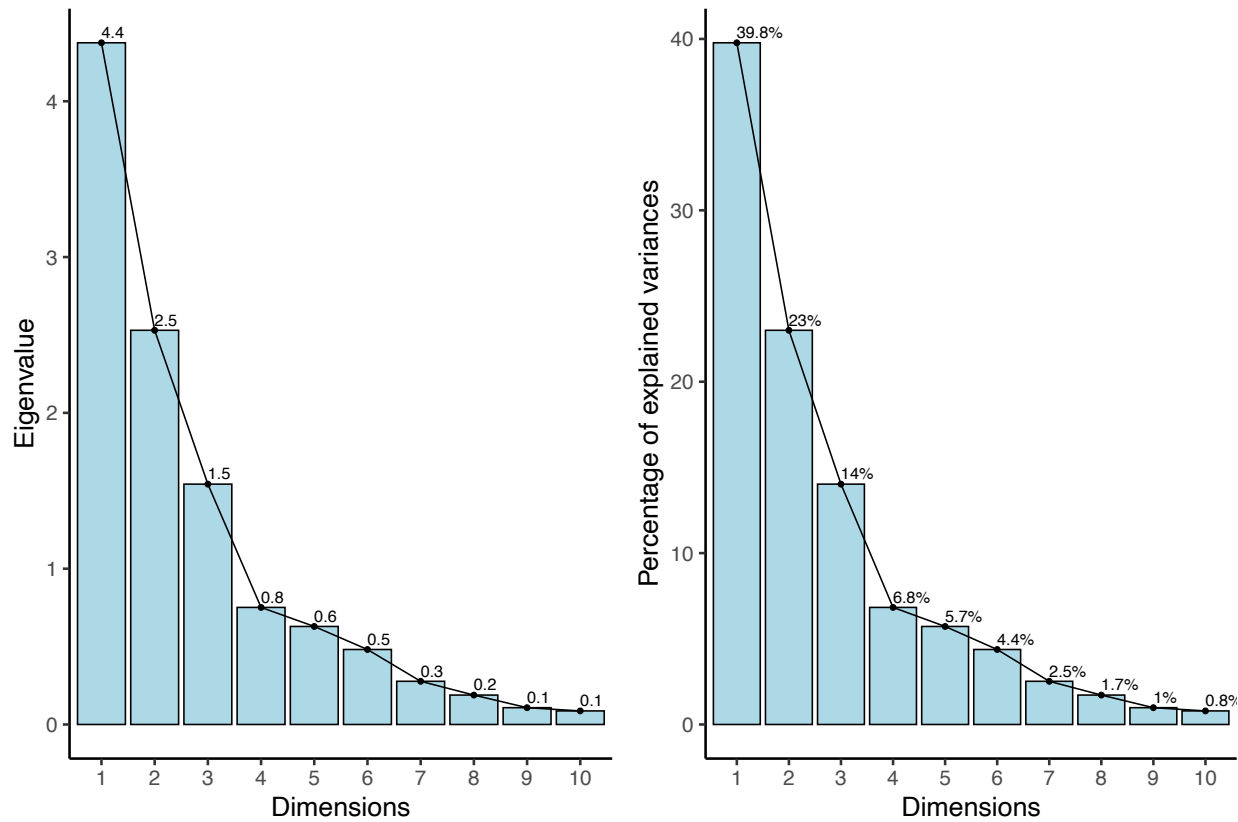

*Note.* Top: Scree plot illustrating the eigenvalues for each component. The first two dimensions combined explain 62.8% of the variance; the first three dimensions combined explain 76.8% of the variance.



### Supplementary Table S5

#### *Variable Contribution to the Principal Component Analysis*

| Variable        | PC1         | PC2         | PC3         |
|-----------------|-------------|-------------|-------------|
| Jitter (local)  | <b>19.7</b> | 0.7         | 0.5         |
| HNR35           | <b>19.1</b> | 2.2         | 0.0         |
| Shimmer (local) | <b>17.7</b> | 3.2         | 0.1         |
| Syllable rate   | <b>11.0</b> | 0.1         | 0.1         |
| amEnvDep        | <b>10.4</b> | 8.5         | 0.4         |
| Mean $f_o$      | 7.7         | <b>13.6</b> | <b>11.5</b> |
| harmHeight      | 6.1         | <b>25.3</b> | 2.0         |
| harmEnergy      | 4.5         | 5.5         | <b>24.0</b> |
| fmDep           | 2.4         | <b>16.0</b> | 2.9         |
| CPP             | 1.4         | <b>14.1</b> | <b>31.0</b> |
| SD $f_o$        | 0.1         | <b>10.9</b> | <b>27.4</b> |

*Note.* Contribution of each acoustic feature to the first, second and third dimensions of the PCA. The threshold for significant contribution is set at 9.1%, represented as the expected value if all 11 variables contributed equally to that dimension. Variables contributing above this threshold are highlighted in bold. amDep: depth of amplitude modulation; HNR35: harmonics-to-noise ratio between 0 and 3.5kHz; harmEnergy: energy in harmonics; fmDep: depth of frequency modulation; harmHeight: Height in harmonics; SD  $f_o$ : standard deviation of the fundamental frequency; Mean  $f_o$ : average fundamental frequency; CPP: cepstral peak prominence.

## Supplementary Figure S10

### *Distribution of Acoustic Features by Melody*

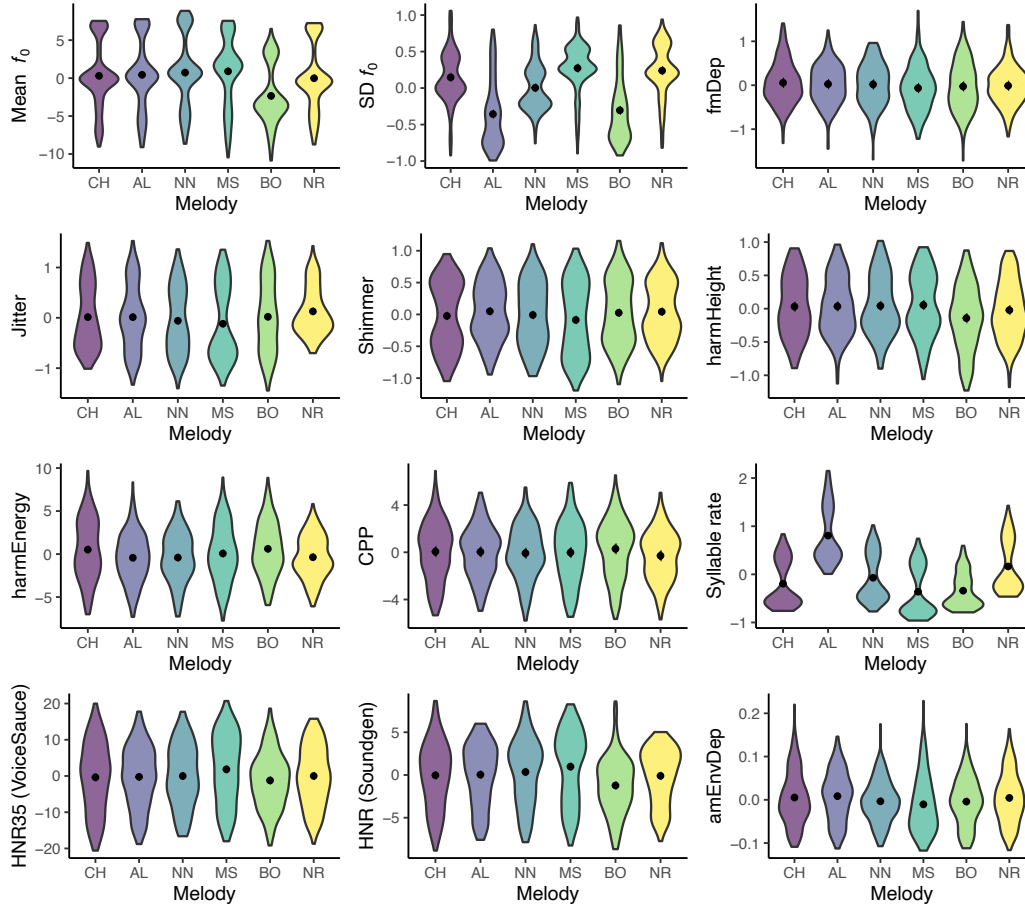

*Note.*  $N = 1320$  performances (220 per melody). Violin plots show the distribution of (zero-centered) acoustic features by melody. Dots and error bars in the center of each distribution represent model-based estimates and 95% confidence intervals (using the `marginalEffects::predictions` function). CH: Chove Chuva, AL: Alecrim Dourado; NN: Nana Nenê; MS: Melodia Sentimental; BO: Boi da Cara Preta; NR: Nesta Rua.  $f_0$ : fundamental frequency; SD: standard deviation; fmDep: depth of frequency modulation; harmHeight: harmonic height; harmEnergy: harmonic energy; CPP: cepstral peak prominence; HNR35: harmonics-to-noise ratio between 0-3.5kHz (VoiceSauce); HNR: harmonics-to-noise ratio (Soundgen); amEnvDep: depth of amplitude modulation; fmDep: depth of frequency modulation. Please see Supplementary Table S6 for a summary of untransformed values of each acoustic feature.

### Supplementary Table S6

*Summary Descriptive Statistics of Acoustic Features by Style of Vocalization, by Type of Production and by Melody*

| Style                           | AD    |       | ID    |       | lullaby |       | pop   |       | opera |       |
|---------------------------------|-------|-------|-------|-------|---------|-------|-------|-------|-------|-------|
|                                 | Mean  | SD    | Mean  | SD    | Mean    | SD    | Mean  | SD    | Mean  | SD    |
| <i>f</i> <sub>0</sub> mean (Hz) | 247   | 24.9  | 350   | 67.1  | 342     | 31    | 341   | 31.1  | 502   | 38.4  |
| <i>f</i> <sub>0</sub> SD (Hz)   | 48.9  | 17.4  | 85.6  | 26    | 50.2    | 19    | 50.6  | 18.7  | 73.9  | 25.6  |
| Jitter (local)                  | 0.013 | 0.005 | 0.014 | 0.005 | 0.005   | 0.002 | 0.005 | 0.002 | 0.005 | 0.002 |
| Shimmer (local)                 | 0.071 | 0.018 | 0.069 | 0.017 | 0.026   | 0.007 | 0.03  | 0.011 | 0.042 | 0.013 |
| CPP (dB)                        | 20.9  | 1.37  | 19.8  | 1.98  | 17.9    | 1.5   | 22.5  | 1.83  | 21.8  | 1.45  |
| HNR35-VS                        | 34.4  | 5.69  | 36.3  | 5.94  | 42      | 5.85  | 48    | 5.38  | 51.9  | 4.75  |
| HNR-Soundgen                    | 15.4  | 1.97  | 17.6  | 2.41  | 22.3    | 2.33  | 21.6  | 2.65  | 22.8  | 1.95  |
| Syllable rate (syl/sec)         | 2.1   | 0.5   | 2.2   | 0.5   | 1.2     | 0.4   | 1.3   | 0.4   | 1.2   | 0.4   |
| harmEnergy (dB)                 | 2.26  | 2.46  | 0.253 | 2.72  | -2.19   | 2.57  | 1.3   | 3.24  | 0.038 | 2.17  |
| harmHeight (Hz)                 | 3921  | 1012  | 5024  | 1747  | 3619    | 947   | 6825  | 1854  | 9318  | 1997  |
| amDep (0-1)                     | 0.20  | 0.05  | 0.22  | 0.05  | 0.13    | 0.04  | 0.13  | 0.04  | 0.18  | 0.03  |
| fmDep (semitones)               | 0.31  | 0.15  | 0.39  | 0.19  | 0.19    | 0.06  | 0.26  | 0.09  | 0.40  | 0.18  |

| Type of production              | /lu/  |       | lyrics |       |
|---------------------------------|-------|-------|--------|-------|
|                                 | Mean  | SD    | Mean   | SD    |
| <i>f</i> <sub>0</sub> mean (Hz) | 358   | 91.6  | 354    | 92.4  |
| <i>f</i> <sub>0</sub> SD (Hz)   | 60.6  | 26    | 63.1   | 26.7  |
| Jitter (local)                  | 0.006 | 0.004 | 0.01   | 0.006 |
| Shimmer (local)                 | 0.043 | 0.021 | 0.052  | 0.025 |
| CPP (dB)                        | 20.5  | 2.46  | 20.6   | 2.17  |
| HNR35-VS                        | 46.1  | 7.3   | 39     | 8.5   |
| HNR-Soundgen                    | 21.2  | 3.46  | 18.7   | 3.53  |
| Syllable rate (syl/sec)         | 1.6   | 0.6   | 1.6    | 0.6   |
| harmEnergy (dB)                 | -1.65 | 2.19  | 2.32   | 2.42  |
| harmHeight (Hz)                 | 5642  | 2636  | 5841   | 2629  |
| amDep (0-1)                     | 0.15  | 0.05  | 0.2    | 0.05  |
| fmDep (semitones)               | 0.3   | 0.17  | 0.32   | 0.16  |

| Melody                            | CH    |      | AL    |      | NN    |      | MS    |      | BO    |      | NR    |      |
|-----------------------------------|-------|------|-------|------|-------|------|-------|------|-------|------|-------|------|
|                                   | Mean  | SD   | Mean  | SD   | Mean  | SD   | Mean  | SD   | Mean  | SD   | Mean  | SD   |
| <b><math>f_0</math> mean (Hz)</b> | 362.0 | 90.1 | 365.0 | 94.5 | 372.0 | 98.7 | 375.0 | 90.3 | 309.0 | 71.3 | 355.0 | 89.3 |
| <b><math>f_0</math> SD (Hz)</b>   | 69.1  | 24.6 | 44    | 23.4 | 59.3  | 19.8 | 77.4  | 21.5 | 45.9  | 23.4 | 75.5  | 24   |
| <b>Jitter (local)</b>             | 0.01  | 0.01 | 0.01  | 0.01 | 0.01  | 0.01 | 0.01  | 0.01 | 0.01  | 0.01 | 0.01  | 0.01 |
| <b>Shimmer (local)</b>            | 0.05  | 0.02 | 0.05  | 0.02 | 0.05  | 0.02 | 0.05  | 0.03 | 0.05  | 0.03 | 0.05  | 0.02 |
| <b>CPP (dB)</b>                   | 20.6  | 2.45 | 20.6  | 2.12 | 20.5  | 2.22 | 20.6  | 2.54 | 20.9  | 2.45 | 20.3  | 2.08 |
| <b>HNR35-VS</b>                   | 42.2  | 9.54 | 42.3  | 8.31 | 42.5  | 8.47 | 44.4  | 9.62 | 41.3  | 7.56 | 42.5  | 8.16 |
| <b>HNR-Soundgen</b>               | 19.9  | 3.82 | 20    | 3.6  | 20.3  | 3.79 | 20.9  | 4.22 | 18.7  | 3.28 | 19.9  | 3.2  |
| <b>Syllable rate (syl/sec)</b>    | 1.4   | 0.5  | 2.4   | 0.6  | 1.5   | 0.5  | 1.2   | 0.5  | 1.2   | 0.4  | 1.7   | 0.5  |
| <b>harmEnergy (dB)</b>            | 0.85  | 3.5  | -0.1  | 2.83 | -0.1  | 2.84 | 0.4   | 3.31 | 0.94  | 3.05 | -0    | 2.46 |
| <b>harmHeight (Hz)</b>            | 5910  | 2674 | 5877  | 2582 | 5974  | 2761 | 6087  | 2789 | 5028  | 2375 | 5573  | 2479 |
| <b>amDep (0-1)</b>                | 0.18  | 0.06 | 0.18  | 0.06 | 0.17  | 0.05 | 0.16  | 0.07 | 0.17  | 0.06 | 0.18  | 0.06 |
| <b>fmDep (semitones)</b>          | 0.33  | 0.18 | 0.31  | 0.14 | 0.31  | 0.15 | 0.29  | 0.18 | 0.31  | 0.18 | 0.3   | 0.15 |

*Note.*  $f_0$ : fundamental frequency; *SD*: standard deviation; CPP: Cepstral peak prominence; HNR35-VS: harmonics-to-noise ratio (0 - 3.5 kHz; from VoiceSauce); HNR-Soundgen: harmonics-to-noise ratio (from Soundgen); fmDep: depth of frequency modulation; harmHeight: harmonic height; harmEnergy: harmonic energy; amDep: depth of amplitude modulation; fmDep: depth of frequency modulation. CH: Chove Chuva, AL: Alecrim Dourado; NN: Nana Nenê; MS: Melodia Sentimental; BO: Boi da Cara Preta; NR: Nesta Rua.

## Supplementary Figure S11

### *Correlation matrix of acoustic features*

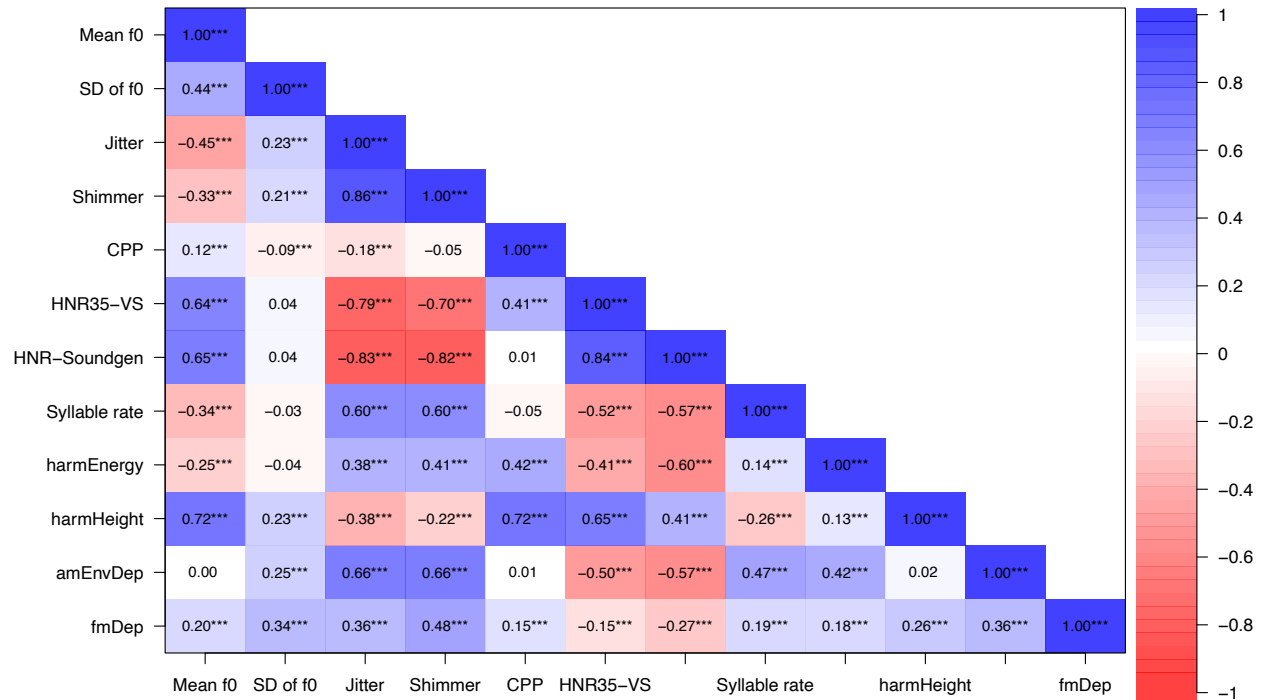

*Note.*  $f_0$ : fundamental frequency; *SD*: standard deviation; *CPP*: Cepstral peak prominence; *HNR35-VS*: harmonics-to-noise ratio (0 - 3.5 kHz; from VoiceSauce); *HNR-Soundgen*: harmonics-to-noise ratio (from Soundgen); *fmDep*: depth of frequency modulation; *harmHeight*: harmonic height; *harmEnergy*: harmonic energy; *amDep*: depth of amplitude modulation; *fmDep*: depth of frequency modulation.

**Supplementary Table S7***Pairwise Comparisons for Effect of Style for each Acoustic Feature*

| Style 1                      | Style 2 | Estimate | Std.error | Statistic | p.adj  |
|------------------------------|---------|----------|-----------|-----------|--------|
| <b><math>f_0</math> mean</b> |         |          |           |           |        |
| ID                           | AD      | 5.810611 | 0.601752  | 9.656152  | <0.001 |
| lullaby                      | AD      | 5.657002 | 0.292127  | 19.3649   | <0.001 |
| lullaby                      | ID      | -0.15361 | 0.607716  | -0.25276  | 0.800  |
| opera                        | AD      | 12.34184 | 0.290805  | 42.44024  | <0.001 |
| opera                        | ID      | 6.531231 | 0.594765  | 10.9812   | <0.001 |
| opera                        | lullaby | 6.68484  | 0.079243  | 84.35925  | <0.001 |
| opera                        | pop     | 6.723434 | 0.076148  | 88.2945   | <0.001 |
| pop                          | AD      | 5.618408 | 0.290823  | 19.31898  | <0.001 |
| pop                          | ID      | -0.1922  | 0.603593  | -0.31843  | 0.750  |
| pop                          | lullaby | -0.03859 | 0.075559  | -0.51078  | 0.610  |
| <b><math>f_0</math> SD</b>   |         |          |           |           |        |
| ID                           | AD      | 0.565674 | 0.053586  | 10.55634  | <0.001 |
| lullaby                      | AD      | 0.001917 | 0.053918  | 0.035555  | 0.972  |
| lullaby                      | ID      | -0.56376 | 0.055299  | -10.1947  | <0.001 |
| opera                        | AD      | 0.401247 | 0.054488  | 7.363938  | <0.001 |
| opera                        | ID      | -0.16443 | 0.056363  | -2.91731  | 0.004  |
| opera                        | lullaby | 0.39933  | 0.01229   | 32.49295  | <0.001 |
| opera                        | pop     | 0.387545 | 0.012584  | 30.79591  | <0.001 |
| pop                          | AD      | 0.013701 | 0.051705  | 0.264993  | 0.791  |
| pop                          | ID      | -0.55197 | 0.0554    | -9.96341  | <0.001 |
| pop                          | lullaby | 0.011784 | 0.012537  | 0.93994   | 0.347  |
| <b>Jitter (local)</b>        |         |          |           |           |        |
| ID                           | AD      | 0.025386 | 0.060033  | 0.422869  | 0.672  |
| lullaby                      | AD      | -1.06468 | 0.053909  | -19.7497  | <0.001 |
| lullaby                      | ID      | -1.09006 | 0.061767  | -17.6479  | <0.001 |
| opera                        | AD      | -1.06951 | 0.059739  | -17.9029  | <0.001 |
| opera                        | ID      | -1.09489 | 0.062948  | -17.3935  | <0.001 |
| opera                        | lullaby | -0.00483 | 0.048382  | -0.0998   | 0.921  |
| opera                        | pop     | 0.004816 | 0.040803  | 0.118041  | 0.906  |
| pop                          | AD      | -1.07432 | 0.053506  | -20.0786  | <0.001 |
| pop                          | ID      | -1.09971 | 0.060104  | -18.2967  | <0.001 |
| pop                          | lullaby | -0.00964 | 0.041006  | -0.23521  | 0.814  |

|         |         | <b>Shimmer (local)</b> |          |          |        |
|---------|---------|------------------------|----------|----------|--------|
| ID      | AD      | -0.02321               | 0.043052 | -0.53911 | 0.590  |
| lullaby | AD      | -1.00341               | 0.053496 | -18.7565 | <0.001 |
| lullaby | ID      | -0.9802                | 0.041324 | -23.7197 | <0.001 |
| opera   | AD      | -0.54796               | 0.065832 | -8.3236  | <0.001 |
| opera   | ID      | -0.52475               | 0.067497 | -7.77446 | <0.001 |
| opera   | lullaby | 0.455443               | 0.068203 | 6.677743 | <0.001 |
| opera   | pop     | 0.312159               | 0.058079 | 5.3747   | <0.001 |
| pop     | AD      | -0.86012               | 0.048851 | -17.6069 | <0.001 |
| pop     | ID      | -0.83691               | 0.043412 | -19.2785 | <0.001 |
| pop     | lullaby | 0.143284               | 0.033894 | 4.227447 | <0.001 |

|         |         | <b>fmDep</b> |          |          |        |
|---------|---------|--------------|----------|----------|--------|
| ID      | AD      | 0.228952     | 0.059626 | 3.839819 | <0.001 |
| lullaby | AD      | -0.40612     | 0.077422 | -5.2455  | <0.001 |
| lullaby | ID      | -0.63507     | 0.060791 | -10.4468 | <0.001 |
| opera   | AD      | 0.265298     | 0.082388 | 3.220101 | 0.001  |
| opera   | ID      | 0.036346     | 0.05508  | 0.659883 | 0.509  |
| opera   | lullaby | 0.671418     | 0.069203 | 9.70213  | <0.001 |
| opera   | pop     | 0.390256     | 0.06249  | 6.245051 | <0.001 |
| pop     | AD      | -0.12496     | 0.061859 | -2.02006 | 0.043  |
| pop     | ID      | -0.35391     | 0.055516 | -6.37488 | <0.001 |
| pop     | lullaby | 0.281162     | 0.042885 | 6.556196 | <0.001 |

|         |         | <b>Height of harmonics</b> |          |          |        |
|---------|---------|----------------------------|----------|----------|--------|
| ID      | AD      | 0.222783                   | 0.065197 | 3.417053 | <0.001 |
| lullaby | AD      | -0.08077                   | 0.048117 | -1.6785  | 0.093  |
| lullaby | ID      | -0.30355                   | 0.072354 | -4.19531 | <0.001 |
| opera   | AD      | 0.876151                   | 0.049639 | 17.65061 | <0.001 |
| opera   | ID      | 0.653368                   | 0.060808 | 10.7447  | <0.001 |
| opera   | lullaby | 0.956916                   | 0.055368 | 17.28288 | <0.001 |
| opera   | pop     | 0.32434                    | 0.044153 | 7.345779 | <0.001 |
| pop     | AD      | 0.551811                   | 0.051171 | 10.78358 | <0.001 |
| pop     | ID      | 0.329028                   | 0.067149 | 4.899964 | <0.001 |
| pop     | lullaby | 0.632576                   | 0.044936 | 14.07735 | <0.001 |

|         |         | <b>Cepstral Peak Prominence</b> |          |          |        |
|---------|---------|---------------------------------|----------|----------|--------|
| ID      | AD      | -1.12852                        | 0.413946 | -2.72624 | 0.006  |
| lullaby | AD      | -3.04947                        | 0.233897 | -13.0377 | <0.001 |
| lullaby | ID      | -1.92095                        | 0.410941 | -4.67452 | <0.001 |
| opera   | AD      | 0.877424                        | 0.278655 | 3.148778 | 0.002  |
| opera   | ID      | 2.005939                        | 0.434227 | 4.619563 | <0.001 |
| opera   | lullaby | 3.92689                         | 0.341744 | 11.49073 | <0.001 |
| opera   | pop     | -0.74224                        | 0.31354  | -2.3673  | 0.018  |
| pop     | AD      | 1.619667                        | 0.283194 | 5.719287 | <0.001 |
| pop     | ID      | 2.748182                        | 0.443447 | 6.197311 | <0.001 |
| pop     | lullaby | 4.669133                        | 0.300248 | 15.55093 | <0.001 |

| <b>HNR35-VS</b> |         |          |          |          |        |
|-----------------|---------|----------|----------|----------|--------|
| ID              | AD      | 1.895379 | 0.788882 | 2.402614 | 0.016  |
| lullaby         | AD      | 7.5865   | 0.980908 | 7.734157 | <0.001 |
| lullaby         | ID      | 5.691121 | 0.986566 | 5.768619 | <0.001 |
| opera           | AD      | 17.49521 | 0.818002 | 21.38773 | <0.001 |
| opera           | ID      | 15.59983 | 0.942007 | 16.5602  | <0.001 |
| opera           | lullaby | 9.908712 | 0.966565 | 10.25147 | <0.001 |
| opera           | pop     | 3.857295 | 0.697289 | 5.531849 | <0.001 |
| pop             | AD      | 13.63792 | 0.703852 | 19.3761  | <0.001 |
| pop             | ID      | 11.74254 | 0.752134 | 15.6123  | <0.001 |
| pop             | lullaby | 6.051417 | 0.670277 | 9.02823  | <0.001 |

| <b>HNR- Soundgen</b> |         |          |          |          |        |
|----------------------|---------|----------|----------|----------|--------|
| ID                   | AD      | 2.222059 | 0.367871 | 6.040324 | <0.001 |
| lullaby              | AD      | 6.96858  | 0.369015 | 18.88428 | <0.001 |
| lullaby              | ID      | 4.746521 | 0.352663 | 13.45909 | <0.001 |
| opera                | AD      | 7.447891 | 0.333636 | 22.32341 | <0.001 |
| opera                | ID      | 5.225833 | 0.429902 | 12.15586 | <0.001 |
| opera                | lullaby | 0.479311 | 0.338255 | 1.417012 | 0.156  |
| opera                | pop     | 1.191989 | 0.274665 | 4.339793 | <0.001 |
| pop                  | AD      | 6.255902 | 0.26841  | 23.30724 | <0.001 |
| pop                  | ID      | 4.033844 | 0.308736 | 13.06568 | <0.001 |
| pop                  | lullaby | -0.71268 | 0.180394 | -3.95067 | <0.001 |

| <b>Syllable rate</b> |         |          |          |          |        |
|----------------------|---------|----------|----------|----------|--------|
| ID                   | AD      | 0.105456 | 0.039924 | 2.641413 | 0.008  |
| lullaby              | AD      | -0.87925 | 0.042031 | -20.9192 | <0.001 |
| lullaby              | ID      | -0.9847  | 0.048752 | -20.1983 | <0.001 |
| opera                | AD      | -0.91471 | 0.040968 | -22.3276 | <0.001 |
| opera                | ID      | -1.02017 | 0.049461 | -20.6259 | <0.001 |
| opera                | lullaby | -0.03547 | 0.015052 | -2.35626 | 0.018  |
| opera                | pop     | -0.11313 | 0.011814 | -9.57621 | <0.001 |
| pop                  | AD      | -0.80158 | 0.040941 | -19.5788 | <0.001 |
| pop                  | ID      | -0.90704 | 0.049051 | -18.4916 | <0.001 |
| pop                  | lullaby | 0.077667 | 0.012042 | 6.449554 | <0.001 |

| <b>harmEnergy</b> |         |          |          |          |        |
|-------------------|---------|----------|----------|----------|--------|
| ID                | AD      | -2.01188 | 0.437015 | -4.6037  | <0.001 |
| lullaby           | AD      | -4.45575 | 0.383861 | -11.6077 | <0.001 |
| lullaby           | ID      | -2.44386 | 0.21569  | -11.3305 | <0.001 |
| opera             | AD      | -2.22677 | 0.37855  | -5.88238 | <0.001 |
| opera             | ID      | -0.21489 | 0.470395 | -0.45682 | 0.648  |
| opera             | lullaby | 2.228974 | 0.388824 | 5.732602 | <0.001 |
| opera             | pop     | -1.26104 | 0.292649 | -4.30907 | <0.001 |
| pop               | AD      | -0.96573 | 0.276201 | -3.49646 | <0.001 |
| pop               | ID      | 1.046158 | 0.357961 | 2.922548 | 0.003  |
| pop               | lullaby | 3.490019 | 0.286295 | 12.19027 | <0.001 |



|         |         | <b>amDep</b> |          |          |        |
|---------|---------|--------------|----------|----------|--------|
| ID      | AD      | 0.022117     | 0.006451 | 3.428378 | <0.001 |
| lullaby | AD      | -0.07092     | 0.004991 | -14.2103 | <0.001 |
| lullaby | ID      | -0.09304     | 0.005961 | -15.6086 | <0.001 |
| opera   | AD      | -0.01605     | 0.005629 | -2.85207 | 0.004  |
| opera   | ID      | -0.03817     | 0.005569 | -6.85461 | <0.001 |
| opera   | lullaby | 0.05487      | 0.003337 | 16.44133 | <0.001 |
| opera   | pop     | 0.053432     | 0.00309  | 17.29401 | <0.001 |
| pop     | AD      | -0.06949     | 0.004441 | -15.6451 | <0.001 |
| pop     | ID      | -0.0916      | 0.005382 | -17.0199 | <0.001 |
| pop     | lullaby | 0.001438     | 0.002577 | 0.557828 | 0.577  |

*Note.* Pairwise comparisons between Styles obtained with the `avg_comparisons` function from the `marginalEffects` R package, based on linear mixed models predicting each acoustic feature from Style, Type of production, Melody, and their two-way interactions (acoustic feature  $\sim 0 + \text{Style:Melody} + \text{Style:Type} + \text{Melody:Type} + (1 + \text{Style} | \text{Singer})$ ). p.adj: p-values adjusted with the Holm method; AD: adult-directed; ID: infant-directed;  $f_0$ : fundamental frequency; SD: standard deviation. CPP: Cepstral peak prominence; HNR35-VS: harmonics-to-noise ratio (0 - 3.5 kHz; from VoiceSauce); HNR-Soundgen: harmonics-to-noise ratio (from Soundgen); fmDep: depth of frequency modulation; harmHeight: harmonic height; harmEnergy: harmonic energy; amDep: depth of amplitude modulation; fmDep: depth of frequency modulation.

## References

- Anikin, A. (2019). Soundgen: An open-source tool for synthesizing nonverbal vocalizations. *Behavior Research Methods*, 51(2), 778–792. <https://doi.org/10.3758/s13428-018-1095-7>
- Bogdanov, D., Wack, N., Gomez, E., Gulati, S., Herrera, P., & Serra, X. (2013). Essentia: An audio analysis library for music information retrieval. *Proceedings of the 14th International Society for Music Information Retrieval Conference*, 493–498. <https://ismir2013.ismir.net/wp-content/uploads/2013/10/Proceedings-ISMIR2013-Final.pdf>
- Bruder, C., & Larrouy-Maestri, P. (2023). Classical singers are also proficient in non-classical singing. *Frontiers in Psychology*, 14. <https://doi.org/10.3389/fpsyg.2023.1215370>
- Müllensiefen, D., Gingras, B., Musil, J., & Stewart, L. (2014). The musicality of non-musicians: An index for assessing musical sophistication in the general population. *PLoS ONE*, 9(2), e89642. <https://doi.org/10.1371/journal.pone.0089642>
- Shue, Y. L., Keating, P., Vicenik, C., & Yu, K. (2011). VoiceSauce: A program for voice analysis. *Proceedings of the ICPhS XVII, 1846-1849*. [https://linguistics.ucla.edu/people/keating/Shue-etal\\_ICPhS\\_2011.pdf](https://linguistics.ucla.edu/people/keating/Shue-etal_ICPhS_2011.pdf)
- Wagner, H. L. (1993). On measuring performance in category judgment studies of nonverbal behavior. *Journal of Nonverbal Behavior*, 17(1), 3–28. <https://doi.org/10.1007/BF00987006>
